# Supplementary material for: Additive-Assisted Crystallization of 9,10-Diphenylanthracene
Source: MDPI journal article supplement (doi:10.3390/cryst13060861), 2023-05-24
Supplement: s1 [file s1]

Supplementary Materials:

# Additive-assisted crystallization of 9,10-diphenylanthracene

Alina A. Sonina <sup>1,2</sup>, Darya S. Cheshkina <sup>1</sup> and Maxim S. Kazantsev <sup>1,\*</sup>

<sup>1</sup> Organic Electronics Laboratory, N.N. Vorozhtsov Novosibirsk Institute of Organic Chemistry SB RAS, Lavrentiev Ave. 9, Novosibirsk 630090, Russia

<sup>2</sup> Solid State Chemistry Department, Faculty of Natural Sciences, Novosibirsk State University, Pirogova 2, Novosibirsk 630090, Russia

**Table S1.** Crystal data, data collection, and structure refinement parameters for PYR-DPA co-crystal.

|                                                     |                                                                  |                                                                                                                |                    |
|-----------------------------------------------------|------------------------------------------------------------------|----------------------------------------------------------------------------------------------------------------|--------------------|
| <b>Chemical formula</b>                             | C <sub>26</sub> H <sub>18</sub> ·C <sub>16</sub> H <sub>10</sub> | <b>Crystal size (mm)</b>                                                                                       | 0.845; 0.719; 0.03 |
| <b><i>M<sub>r</sub></i></b>                         | 532.64                                                           | <b>Crystal color</b>                                                                                           | colorless          |
| <b>Crystal system, space group</b>                  | Monoclinic, <i>P</i> 2 <sub>1</sub> / <i>c</i>                   | <b><i>μ</i> (mm<sup>-1</sup>)</b>                                                                              | 0.07               |
| <b><i>a</i>, <i>b</i>, <i>c</i> (Å)</b>             | 16.4311 (10),<br>8.0300 (3),<br>11.2057 (7)                      | <b>No. of measured, independent and observed [<i>I</i> &gt; 2σ(<i>I</i>)] reflections</b>                      | 14194, 3143, 2160  |
| <b><i>β</i> (°)</b>                                 | 104.651 (2)                                                      | <b><i>R</i><sub>int</sub></b>                                                                                  | 0.047              |
| <b><i>V</i> (Å<sup>3</sup>)</b>                     | 1430.42 (14)                                                     | <b><i>R</i>[<i>F</i><sup>2</sup> &gt; 2σ(<i>F</i><sup>2</sup>)], <i>wR</i>(<i>F</i><sup>2</sup>), <i>S</i></b> | 0.051, 0.143, 1.02 |
| <b><i>Z</i>/<i>Z</i>'</b>                           | 2/0.5                                                            | <b>Δ<i>Q</i><sub>max</sub>, Δ<i>Q</i><sub>min</sub> (e Å<sup>-3</sup>)</b>                                     | 0.21, −0.17        |
| <b><i>D</i><sub>calcd</sub> (g cm<sup>-3</sup>)</b> | 1.237                                                            |                                                                                                                |                    |

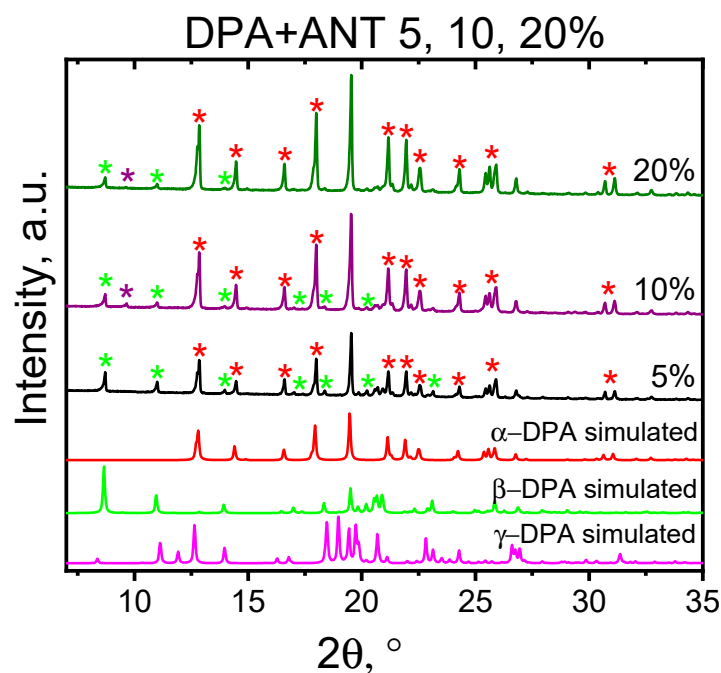

**Figure S1.** Powder X-ray diffraction patterns of DPA+ANT samples crystallized with different ANT concentrations in comparison with that of DPA polymorphs simulated from single crystal X-ray diffraction data of α-form (red), β-form (green) and γ-form (magenta). Asterisks with matching colors demonstrate the peaks related to α-(red), β-DPA (green) and anthracene peak (purple).

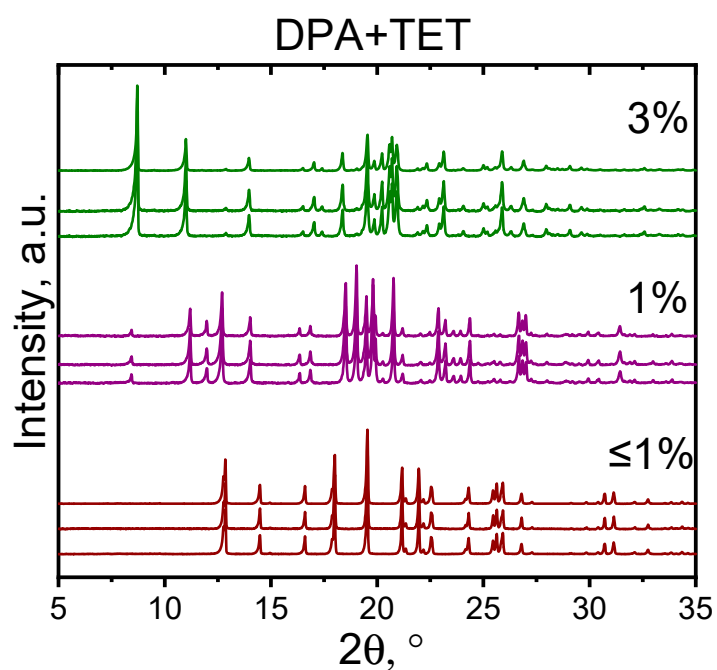

**Figure S2.** A series of powder X-ray diffraction patterns of DPA+TET samples with variable TET concentrations.

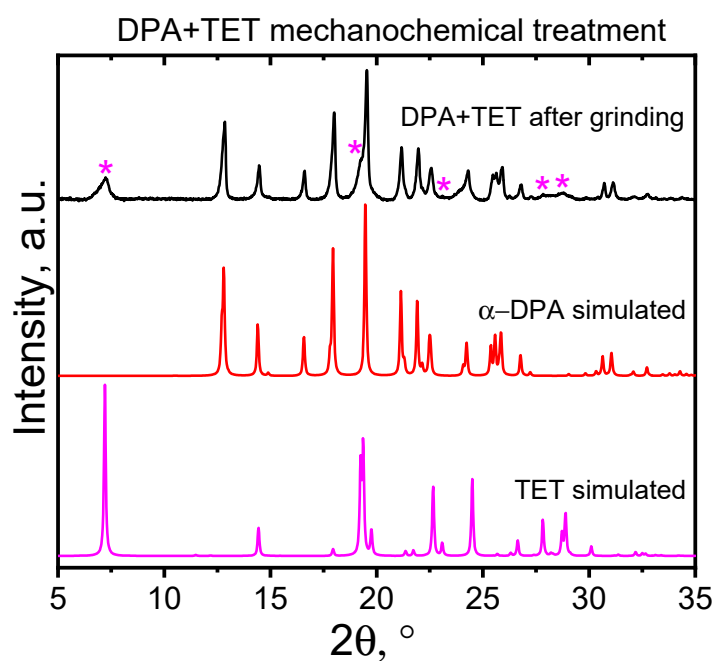

**Figure S3.** Powder X-ray diffraction patterns of DPA+TET mixture after mechanochemical treatment in comparison with that of  $\alpha$ -DPA (red) and TET (magenta) simulated from single crystal X-ray diffraction data. Asterisks with magenta color demonstrate the peaks related to TET.

**Table S2.** Noncovalent interactions in PYR-DPA co-crystal at 296 K.

|         | Interactions                         | H...Cg (Å) | D <sub>pln</sub> (Å) | C-H...Cg (°) |
|---------|--------------------------------------|------------|----------------------|--------------|
| DPA-DPA | C <sub>4</sub> -H...Cg <sup>2</sup>  | 2.72       | 2.68                 | 150          |
|         | C <sub>5</sub> -H...Cg <sup>1</sup>  | 3.06       | 2.88                 | 136          |
| DPA-PYR | C <sub>10</sub> -H...Cg <sup>5</sup> | 2.92       | 2.86                 | 143          |
|         | C <sub>11</sub> -H...Cg <sup>6</sup> | 3.00       | 2.93                 | 150          |
